# Supplementary material for: Amazon rainforest ecosystem exchange of CO 2 and H 2 O through turbulent understory ejections
Source: Copernicus journal article supplement (doi:10.5194/egusphere-2025-452), 2025-03-06
Supplement: Supplementary file [file egusphere-2025-452-AC2-supplement.pdf]

## Rebuttal of ACP manuscript; **Amazon rainforest ecosystem exchange of CO<sub>2</sub> and H<sub>2</sub>O through turbulent understory ejections**

We kindly thank the reviewers and the editor for the time they invested in improving the manuscript, and for their appreciative general remarks. We have addressed individual comments in blue, and attached a track changes manuscript to indicate how we incorporated the feedback.

### Comments from reviewer 2

*This is an excellent and novel paper focused on using high-frequency turbulence observations to evaluate the dynamic nature of rainforest canopy venting events. It is quite appropriate for the journal and generally of high quality. The datasets are quite valuable and unique and are likely to be used by others. I did not download the data but did verify that the authors have posted the data publicly already.*

*It appears that the authors did not extract xylem water for isotopic analysis (no data are shown). This was an unfortunate oversight for such an isotope-intensive project. For this reason, your claims about knowing the isotopic signature of understory transpiration are rather weak. I highly recommend tuning up the modern Craig-Gordon model (as described by Cernusak et al. 2016) to calculate transpiration signatures based on the data in Fig 3B.*

### Xylem water

We agree that optimally, xylem water was sampled in addition to the rootzone, runoff, and leaf water samples. However, xylem water extractions also have their limitations, and are time intensive (de Deurwaerder et al., 2020). Since we study the ecosystem scale, and not individual plants, multiple plants would have needed to be sampled, too. Since resources and time were limited, we took the informed decision to focus on runoff water, and horizontally heterogeneous samples of rootzone water. As far as we are aware, water uptake is (still) understood to be fractionation free, so as long as the measurements are representative, we can approximate the xylem water composition well (Rothfuss & Javaux, 2017).

We are aware that some studies warn that sampling rootzone water to approximate xylem water is challenging (de Deurwaerder et al., 2020; Vega-Grau et al., 2021). Yet, this is true in the context of their studied ecosystems, which are temperate forests with clear wet and dry seasons. Soil evaporation therefore causes strong gradients in rootzone water in these ecosystems, from which plants extract a hard to define subset. We however were in a rainforest, with all year water excess. This flushing of the soil with rainwater equilibrates the isotopic gradients.

A second feature of rainforests is that soil evaporation is very small, as little solar energy reaches the surface through the dense canopy (González-Armas et al., 2025).

This prevents strong vertical isotope gradients to emerge. Moreover, horizontal heterogeneity in rootzone water is generally caused by horizontal gradients in soil evaporation, often due to localized shading. No such local shading is present in a rainforest, suggesting that both horizontal and vertical gradients were limited.

We believe the soil sample analysis verifies this rather uniform water isotopic picture. While at other sites vertical gradients of 40 ‰  $\delta D$  are regularly observed (Canet-Martí et al., 2023), we find 4 ‰  $\delta D$  on average. Moreover, the variability between the four sampling points, which were up to 100m apart, was small. The boxplots in figure 3b indicate an Inter Quartile Range of 3 ‰  $\delta D$  for the deep soil water. In comparison, in a temperate environment, de Deurwaerder et al. (2020) find a  $\delta D$  variability of 25 ‰ in the xylem water of one tree during one day.

### Craig – Gordon model implementation

During the analysis phase of our dataset, a quantitative relationship between the liquid water samples and the vapor source composition was considered but not followed given the scope of this manuscript (understory ejections). In current work for an envisioned follow up manuscript, we analyse the isotopic water and carbon cycles using isotope fluxes for flux partitioning. There, we focus on bulk canopy fluxes only.

Following the comments from reviewer 2, we have now implemented the Craig-Gordon model (Craig & Gordon, 1965) and present the results here. In the line of argumentation of our manuscript, we compare the leaf water  $\delta D$  isotopic compositions from the understory and bulk canopy. We combine data from our work with ecophysiology and profile measurements from our colleagues, which were also taken during the CloudRoots Amazon22 campaign (González-Armas et al., 2025). A 14:00 case from a full-campaign data composite was analysed. The key variables derived from either the data composite or the literature are displayed in the table below.

| Variable                                                                                | Canopy top<br>(bulk, ~25m) | Understory<br>(~5m)   |
|-----------------------------------------------------------------------------------------|----------------------------|-----------------------|
| $\delta D_a$ , atmospheric vapor                                                        | -65 ‰                      | -65 ‰                 |
| $\delta D_s$ , xylem water approximated from mean of deep soil and runoff water samples | -24 ‰                      | -24 ‰                 |
| $RH$ , relative humidity (in canopy profiles)                                           | 0.58                       | 0.65                  |
| $T_{leaf}$ (air temp in canopy profiles)                                                | 33 °C                      | 30 °C                 |
| $R_s$ (measured stomatal resistance)                                                    | 136 s m <sup>-1</sup>      | 512 s m <sup>-1</sup> |
| $R_b$ (modelled boundary layer resistance, dependent on U, following Bonan (2002))      | 77 s m <sup>-1</sup>       | 245 s m <sup>-1</sup> |
| $\alpha^+$ (liquid to water fractionation, following Horita and Wesolowski (1994))      | 1.0706                     | 1.0735                |
| $\alpha_k$ (kinetic fractionation, following Farquhar et al. (1989))                    | 1.0221                     | 1.0224                |
| $\delta D_e$ , exchange site liquid water (from Eq. A1)                                 | 29.2 ‰                     | 27.3 ‰                |
| $\delta D_L$ , leaf sample liquid water (avg, see Fig. 3B)                              | 9.6 ‰                      | 7.6 ‰                 |

We applied the modern Craig-Gordon model, as is commonly used in plant water isotope studies (Barbour et al., 2017; Cernusak et al., 2016; Farquhar et al., 2007). The model output suggests that the exchange site liquid water was enriched in Deuterium to nearly 30 ‰. This is 20 ‰ higher compared to the composition of the bulk leaf samples. This difference is expected, as the water in the leaf lamina and the veins is a mixture between the source water and exchange site water, regulated by the Peclet effect (Cernusak et al., 2016). Importantly, exchange site liquid water isotopic compositions cannot reliably be converted to a leaf averaged water isotopic composition. Approximations for this link do exist (e.g. eq. 16 of Cernusak et al. (2016)), but these are highly dependent on an uncertain empirical effective path length and assumptions regarding the distribution of water between the veins and the lamina (Farquhar & Lloyd, 1993).

The model output also suggests a 1.9 ‰ stronger enrichment in the leaves from the canopy top, compared to understory leaves. This is qualitatively and quantitatively similar to the observed difference in the leaf samples we took, in which the top canopy leaves were enriched by 2.0 ‰ (note that the enrichment found in the leaf samples is not statistically significant, see comment L.197).

Comparing the output of the Craig – Gordon model to the Miller-Tans derived source isotopic compositions of the bulk canopy (Fig 3 of manuscript) is possible, but not insightful. This is because steady-state models assume the isotopic composition of evaporated water vapor to match the composition of the liquid source water. Formulations for the isotope ratio of evaporated air (RE), like given in Barbour et al. (2017) equation 4, thus literally solve for the source isotopic composition ( $R_{xylem}$ ), which we already know from the rootzone and runoff water. The link we find in our study between the bulk (equilibrium) vapor source compositions (-25 ‰) and  $\delta$  xylem (-24 ‰), is more meaningful, as it is not dependent on steady state assumptions. We already mention this finding in L. 199 - 201, for readers interested in the water cycle.

The Miller-Tans derived understory source composition cannot usefully be compared to the output of the Craig-Gordon model. This is because understory air represents an unknown mix of understory (leaf) transpiration and soil evaporation, while the Craig-Gordon model is only applicable for leaves. We can safely assume that  $\delta$  evaporation is much more depleted than  $\delta$  transpiration, as soil evaporation is not an equilibrium process (see Fig. A). Only if the top soil water (-6 ‰) would approach the isotopic composition at the leaf exchange sites (29 ‰) could we expect  $\delta$  evaporation to match  $\delta$  transpiration, which is not realistic in most ecosystems, and especially not in rainforests, as described above.

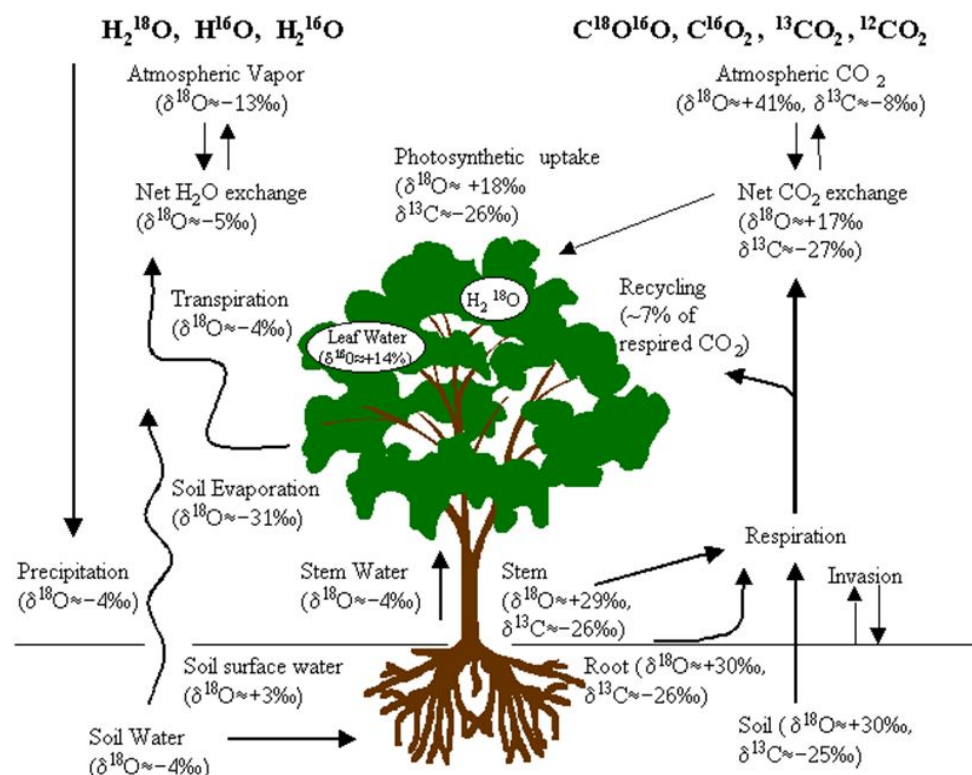

Figure A: From Dan Yakir's lab website: <https://www.weizmann.ac.il/EPS/Yakir/stable-isotopes-lab>

In principle, we could partition the evaporation (E) and transpiration (T) fluxes in the understory to first order. The isotopic compositions of the leaf transpiration and soil evaporation would be used end members, and the understory vapor source composition should then allow us to solve for the relative contributions of E and T. For us, the large uncertainty in the Miller-Tans derived understory vapor source composition is the main reason not to pursue this path. The scale difference between ecosystem scale ejections and local leaves, and need for approximations for e.g. the soil diffusive fractionation, are also important considerations.

We know from our measurements that the understory vapor source is depleted compared to bulk canopy air by about 10 ‰. This depletion is stronger than the measured 2.0 ‰ depletion of liquid water samples from understory leaves compared to top canopy (bulk) leaves. Qualitatively, soil evaporation can be

understood to close this logical gap, as it is known to be much more depleted compared to leaf transpiration.

### Conclusion and changes to manuscript

We recognize that the original manuscript addresses the isotopic water cycle too briefly, which leaves specialist readers with questions. We therefore implemented some improvements which should better communicate the coherence of our understanding of the water isotopic state of the plants and the soil.

We appreciate the idea of including a quantitative link between the vapor source compositions, and the leaf and soil samples. Thus, we implemented the Craig – Gordon model to deepen our understanding of the differences between the bulk canopy and the understory. The outcome is in line with our understanding and the results, and we believe it can help the reader understand the water isotopic context. We have therefore added the results to our main text. We find, however, that the CG model does not allow for the isotopic compositions of the liquid water samples and the vapor source compositions derived with the Miller-Tans method to be related quantitatively. As this limits the importance of the CG implementation to the reader, we move it to the appendix.

More elaborate analysis methods include using complex non-steady-state Craig-Gordon models, empirically linking evaporation site enrichments to leaf enrichments, and partitioning the E and T fluxes (in the understory). While we choose not to pursue these now, we hope to apply some of these methods in our upcoming work in which we plan to partition bulk H<sub>2</sub>O and CO<sub>2</sub> exchange using isotope fluxes.

### Changes:

- (L. 197) Added “An ANOVA test indicates that the depletion of understory leaves compared to bulk leaves is not significant for our sample ( $p=0.34$ )”
- (L. 198) Added “The Craig - Gordon model was used to determine the isotopic composition of the liquid water at the exchange site ( $\delta_e$ ), as a function of the isotopic composition of atmospheric water vapor ( $\delta_a$ ), the source water ( $\delta_s$ ) of the plant, and environmental variables (appendix A3). In line with our understanding, it suggests that  $\delta_e$  of leaves from the bulk canopy is 20 ‰ more enriched compared to the leaf water average derived from our sample (Cernusak et al., 2016). In addition,  $\delta_e$  of understory leaves is depleted by 1.9 ‰ compared to the leaves from the bulk canopy. This supports the idea that understory leaf water is comparatively depleted too.”
- (L. 199) replaced “Thus, evaporation of water from understory leaves and the soil explains the lower  $\delta D$  source signatures observed for the understory ejections.” with “The 10 ‰ Deuterium depletion of understory source air in Fig. 3 cannot qualitatively be explained by a  $\approx 2$  ‰ depletion in leaves only.”

Liquid water in the soil is about 20 ‰ depleted compared to leaf water (Fig. 3B), and thus evaporated vapor from the soil should have a similar depletion of 20 ‰ compared to transpiration from leaves. We can thus expect that contributions from soil evaporation, which contribute to the understory source air, explain the 10 ‰ depletion we find.”

- (L. 200) Added “Plant source water is the average of the water in the root zone, which can be sampled from the plant xylem (de Deurwaerder et al., 2020). We approximate the isotopic composition of the source water by taking the average of the deep soil samples (-20 ‰), and a sample of taken from a stream draining the local plateau (-27.4 ‰ at ≈70 m lower elevation). This approximation is supported by the fact that plant water uptake does not cause isotopic fractionation, and the knowledge that horizontal and vertical water isotopic gradients are limited in a rain forest with excess precipitation (Rothfuss and Javaux, 2017; Vega-Grau et al., 2021).”
- Appendix A3 was added, which details the implementation of the Craig-Gordon model, including the table of variables.

*The introduction is well written and concise, with a clear hypothesis. I have many mostly minor comments that should be addressed before publication. However, this paper definitely should be published! Nice work!*

*It would be great to see a version of Fig 2 for sensible and latent heat fluxes also, and maybe add typical profiles during midday of the various scalars.*

Below we share the new version of Fig 2 and include the H<sub>2</sub>O quadrant flux figure.

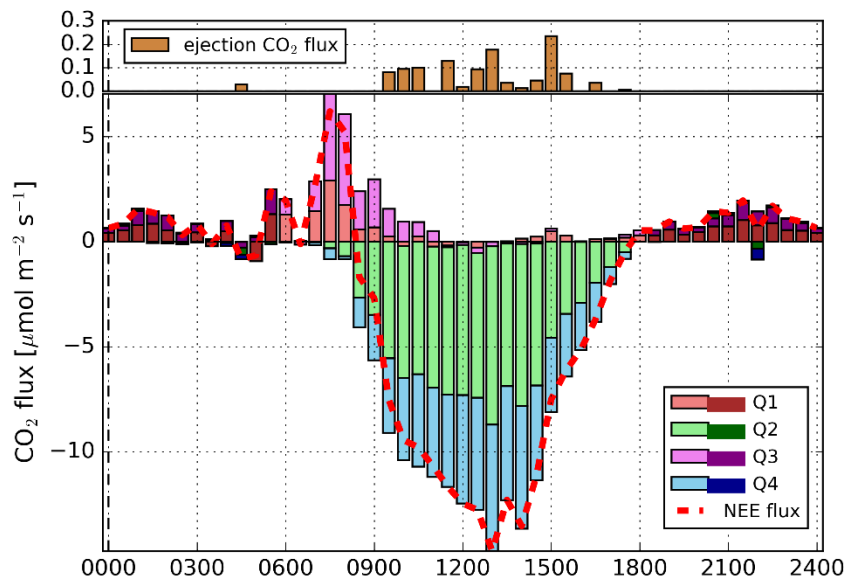



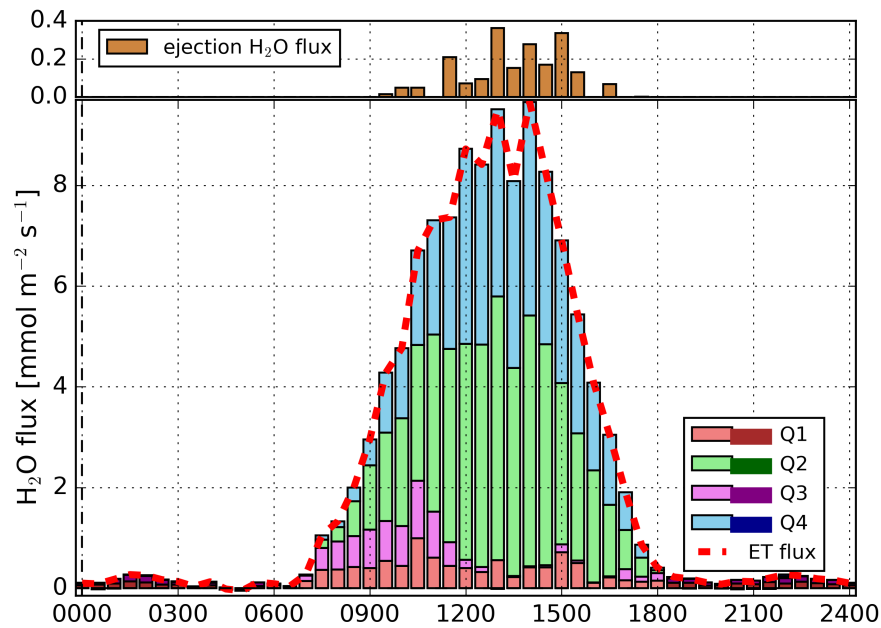

We find a strong daytime evapotranspiration flux, contrasted by relatively small nighttime fluxes. In the early morning, some negative moisture fluxes – potentially indicating dewfall - are present, but of a small order of magnitude ( $-0.04 \text{ mmol m}^{-2} \text{ s}^{-1}$ ). As the quadrants are defined in  $\text{H}_2\text{O}$ - $\text{CO}_2$  space, the partitioning per quadrant is comparable to the  $\text{CO}_2$  quadrant flux plot. Q2 and Q4 represent the dominant exchange mode during daytime, while Q1 and Q3 relate to nighttime and respiration rich episodes.

During our analysis phase, we already spent time investigating the  $\text{H}_2\text{O}$  quadrant fluxes. We find that the (effectively) unidirectional fluxes in all quadrants limit the additional value of partitioning the fluxes in quadrants. Whilst we find the idea of a quadrant investigation into the temperature fluctuations interesting, we consider it to be outside of the scope of this study.

The main comment of reviewer 1 was about profiles and potentially linking them to observed ejections. As the response covers two pages, we (only this time) refer you to that rebuttal to see how we addressed in-canopy profiles. In short, we share profile data measured at the site during our campaign. While a stable layer with a buildup with  $\text{CO}_2$  is clearly observed, we do not see viable ways of linking both directly, due to the scale differences.

Changes:

- We include the  $\text{H}_2\text{O}$  quadrant flux figure in the appendix
- We add references to the appendix in Fig. 2, L.72, and L.177
- (L.45)
  - We refer to the work of (González-Armas et al., 2025)

- We specify the ecosystem scale of our measurements and indicate that direct links to profiles were not considered insightful.
- (L.240 (discussion))
  - We mention the temporally averaged local profiles taken during CloudRoots Amazon22 as presented in Gonzales-Armas et al (2025), which confirm a stable layer in the canopy with a visible respiratory signature.

*Abstract: this statement is incorrect "We show that this matches the depleted water vapor isotopic compositions found in understory leaf and soil samples". Understory leaf water was about +8 ‰  $\delta D$ , and soil water was -15 to -20 ‰ (Fig 3B). All of these values are more enriched than the background atmosphere and the estimated values of source composition (Fig 3A). Where is the match?*

This point was also raised by referee 1, and we acknowledge that this statement is misleading. Specifically, the word “vapor”, suggests that understory leaf and soil water vapor was measured, while only the liquid water was measured. The match we suggest is a qualitative one. Namely, that understory leaf and soil liquid water are depleted compared to bulk leaf liquid water. A logical consequence is that the vapor from these depleted liquid sources is also more depleted than the vapor transpired from enriched leaves.

Changes:

- (L. 8) Remove the word ‘vapor’ and specify that liquid understory water was comparatively depleted compared to liquid ‘bulk’ water.
- (L. 199) replaced “Thus, evaporation of water from understory leaves and the soil explains the lower  $\delta D$  source signatures observed for the understory ejections.” with “The 10 ‰ Deuterium depletion of understory source air in Fig. 3 cannot qualitatively be explained by a  $\approx 2$  ‰ depletion in leaves only. Liquid water in the soil is about 20 ‰ depleted compared to leaf water (Fig. 3B), and thus evaporated vapor from the soil should have a similar depletion of 20 ‰ compared to transpiration from leaves. We can thus expect that contributions from soil evaporation, which are also part of the understory source air, explain the 10 ‰ depletion we find.”

*Minor comments:*

*3: forest atmosphere interface (not interphase)*

Adjusted accordingly

*12: weak but coherent ( $r=0.027$ ) - unclear meaning upon reading abstract*



We agree that this is unclear for a new reader. We struggled with this formulation and ended up with a too nuanced statement for an abstract. The key takeaway is that a weak relationship was found.

Adjusted accordingly

*14-15: how can a deeper understanding of gas exchange prevent the transition from C sink to source?*

This is a fair point. The logical pathway – as is true for most climate research – would be general climate change mitigation policy. Reliable biosphere feedback predictions do clarify the non-linear consequences of future emissions. That knowledge does allow policy makers to take into account both the effect on the rainforest, and of the extra emissions from the rainforest. Compared to not knowing, knowing thus gives the rainforest a larger chance of remaining a sink.

Changes:

- (L.14) adjusted “is urgent for predicting and possibly preventing” to “which may ultimately allow decision makers to incorporate policies which can prevent”

*48: 20 Hz sampling rate here, but Fig 1 caption says 10 Hz*

Sonic and OPGA data were taken at 20 Hz, while Fig 1 indeed displays 10Hz data. This subsampling was needed to link the EC measurements to the isotope analysers (H<sub>2</sub>O-iso at 4Hz, CO<sub>2</sub>-iso at 10Hz). We performed our analysis on both these 10Hz and 4Hz ‘aligned’ datasets. In this work we do not use the CO<sub>2</sub> isotope data. Still, we used that data for Fig 1, as it has a higher frequency. Making Fig 1 with 20Hz data instead would require redoing our analysis for that data set, and is not expected to add value.

Changes:

- (L.54) The subsampling of EC data dependent on the isotope analyser measurement frequency is now specified.

*60: improved and improvement redundant*

Adjusted accordingly: removed improved

*74: other usage of the hyperbolic isolation function for isotopic exchange can be found here: Bowling et al (1999) JGR 104:9121, and (2003) AFM 116:159*

Adjusted accordingly: Reference to Bowling et al (1999) added.

76: for isolation OF wind sweeps and ejections

Adjusted accordingly

79: 2 sigma represents standard deviation of the residuals from the ODR fit? - more mathematical detail needed here so others can reproduce this

Correct, the standard deviation of the residual (y) is meant. Note that the residuals in x, or a std defined perpendicular to the fitted line, would all result in the same effective threshold due to symmetry.

Changes:

- Specify that the std of the residuals was used
- (L.80) Clarify 2.5 sigma boundary.

80: ejections are Q1 not Q2 according to your notation in Fig 1 (your notation is consistent with Thomas et al. (2008) and those events were identified by them as subcanopy-venting updrafts - please be clear that the labeling of quadrants is dependent on the variables plotted - the Shaw ejections in Q2 (your Fig A5) are not the same meaning as Q2 in your Fig 1

This is well spotted and correct. Indeed the ejections in Fig 1 are in a different quadrant compared to the wind ejections in Fig A5 (after Shaw et al. (1983)). For that reason, we had used an inverted co2 (x) axis in an earlier version of this manuscript. The quadrant labeling was a leftover from that version and is now corrected.

Changes:

- We have substituted Q2 with Q1
- (L.67) Note the dissimilarity between quadrants in CO<sub>2</sub>-H<sub>2</sub>O and u-w space.

69-72: more detail would be helpful here - it seems you are splitting the total turbulent flux based on the quadrants, and for each quadrant taking a Reynolds average of the instantaneous product of w and scalars (or w and u)? so total turbulent flux = sum of turbulent fluxes in each quadrant?

The total flux was not split, but the fluxes were calculated separately for each quadrant. The sum then matches the total flux according to:

$$F_{tot} = \sum_{i=1}^4 F_{Qi} = \rho_m \sum_{i=1}^4 \overline{w'_{Qi} \chi'_{Qi}} \frac{n_{Qi}}{n_{tot}} \quad \text{Eq. 1}$$

This equation has been added to the revised manuscript

Changes:

- (L.68) Elaborate on approach for calculating the quadrant fluxes
- (L.72) Add eq. 1., including a description of the variables.

*80-83: more detail needed here - show us the equations that define how you calculate the bulk and ejection fluxes*

Adjusted accordingly: Clarify formulation and link directly to eq. 1. The fluxes calculated with the subset 'bulk', and the subset 'ejection', now sum to the total flux.

*87: are those 36 consecutive points or 36 from anywhere within the 7200?*

We mean 36 points from anywhere. We believe that the formulation does not suggest consecutive points. Moreover, adding a specification of 'anywhere' or 'random' is believed to decrease the clarity of the formulation.

*88: one-sided uncertainties is vague, and more detail would be helpful on why "unrealistic source compositions" occurred*

In Miller-Tans equations, the value of the slope represents the source isotopic composition. The standard error of the slope of the fit was derived following York (1968). Here, the uncertainty in the input variables is propagated to the uncertainty in the slope. The precision of the 4Hz H<sub>2</sub>O molefraction data was ~1ppm, and the precision of the 4Hz dD was ~0.5 ‰. Ultimately, we used a limit of 6 ‰ to exclude extreme outliers (and not 9 ‰, which was stated in the original manuscript).

The outliers in the source isotopic composition which were deemed unrealistic are difficult to understand. Most unrealistic values occurred during nighttime. After looking into some examples, we suspect that changes in air masses, possibly related to nighttime atmospheric heterogeneity, play a role. Here, the one-source mixing assumptions underlying the Miller Tans (and Keeling) methods are likely violated.

Changes:

- We clarify the error propagation through Miller Tans slope fit.
- We explain that standard errors in the slope of more than 6 ‰ were discarded.
- (L.89) we clarify that the source mixing assumptions underlying the Miller-Tans approach were likely violated at times.

*95: incomplete sentence*

Adjusted accordingly: finished logically

*108-112: this is too vague to understand - this looks like a time-lagged cross correlation between "understory ejection intensity" and "cloud intensity"??? what are "two time series" and why did you not look for the time of maximum cross-correlation? - it seems that Fig 4 D should be labeled to be consistent with these variables (is "ejection occurrence" the same as "understory ejection intensity")?*

We have improved the description, implementing the suggested changes, also to the labels in figure 4 (A!). The time of maximum cross-correlation is indeed relevant, and specified in section 3.4 and Fig 4B.

Changes:

- We use the term time-lagged cross correlation (in the methods and in the results) instead of describing the method.
- We immediately specify the "cloud intensity" and "understory ejection intensity", instead of referring to these as 'the time series defined in the paragraph before'.
- We change the labels of Fig 4A to "cloud intensity" and "understory ejection intensity".

*114: closest cloud onset in time?*

Adjusted accordingly: Note that in our analysis we only have a time dimension.

*Fig 2: please use molar units for the fluxes as in Fig 1*

Adjusted accordingly

*Fig 2 caption: last sentence is vague please provide detail*

Adjusted accordingly: we refer to the newly added Eq. 1, which specifies the method.

*122: associated instantaneous vertical wind speed*

Adjusted accordingly

*125: "anti-correlation between photosynthesis and transpiration" - the wording could be improved, these processes happen together through the stomata - you mean the fluxes go in different directions vertically (and thus their mole fractions in the atmosphere in the presence of these fluxes are anti-correlated)*

Adjusted accordingly: anti-correlated is now related to the mole fractions. Assimilation and transpiration fluxes are instead described as opposed.

129: *I don't understand why you refer to Q3 as "stable background" when the entire example is stable stratification - why only Q3 and not the others?*

We intended to communicate that respiration and evapotranspiration are mixed into the atmospheric reservoir, which is more stable in composition, and shown in Q3 (negative w'). We agree that stable in this context has a double meaning, and can thus better not be used.

Change:

- Replaced "stable background" with "atmospheric background"

*Fig A1 in appendix: conflicting terminology here, "Q1 Respiration" (left column), but also right column says "understory ejection", but the caption says ejections are in Q1*

We have checked the terminology again and think that it is not conflicting. Daytime understory ejections indeed have a respiration signature. Therefore there is overlap between the fingerprints of Q1 and the understory ejections. Indeed, as shown in Fig. 1C, the ejections predominantly take place in Q1.

141: *seems like more than 2 events in Fig A1 rightmost column - at least 3 smaller ones there too*

Adjusted accordingly: we clarify that the ejection in Fig 1C "mostly" represent the two updrafts.

148: *"The bulk of the flushing takes place from 7:00 to 9:00 LT, but the positive relationship between the H2O and CO2 anomalies prevents ejection events from being isolated then" - this is not what I see in that figure - there are ejection events identified prior to 09:00, and the "two phases" of ejections mentioned are not very distinct in the histogram (Fig 1D). Ejections seem to occur throughout the day and are not broken into two clear groups*

We agree that Fig 1D does not allow for the two ejection phases to be clearly separated. Still, there is a notable ejection-lean period at 10:30. In the text, we therefore refer to Fig. 2. There, the initial period of ejections is clearly related to the early morning flushing (Q1,Q3), while the period from 11:00 is not. Importantly, the flushing after 9:00 is more likely to be observed as an ejection, as the bulk flux has turned to photosynthesis-dominant by then. According to both Fig. 2b and Fig. 1D, hardly any ejections (and flux contributions) occur before 9:00.

151: *are there observations of CBL height to compare to strengthen this argument?*

Due to the canopy at ATTO, there are no profiling instruments located there. At the nearby Campina site, some profiling instruments are available. However, analysing

the boundary layer development is not in the scope of this study. Linking our findings to general boundary layer behaviour thus seems sufficient to us.

Change:

- Added a reference to the chapter Atmospheric Boundary Layers of the book Fundamentals of Meteorology from Spiridonov & Ćurić (2021).

*Section 3.2 title: "CO2 flux partitioning" means splitting NEE into GPP and Reco - consider rewording to something like "quadrant analysis of CO2 fluxes"*

Adjusted accordingly

*156: Fig 2 has only 1 panel so no "A" needed*

Adjusted accordingly

*158: "sporadically during noon" - this is not my interpretation of Fig 2, I see sporadic events from 0900 to 1800*

We agree. Our intention was to refer to the daytime period around noon by using "noon", which we realise refers in English language only to 12:00 sharp.

Change:

- We specify the time window from 09:00 to 17:00.

*159: I don't understand the 3.8 to 20% numbers. The largest ejection flux in the figure has a magnitude of  $0.01 \text{ mg m}^{-2} \text{ s}^{-1}$ , but the net uptake of that time was  $\sim -0.38$ , so the ejection flux contributes  $100 \times 0.01/0.38 = 2.6\%$ . Please explain your calculations in detail*

*240: more detail needed on the 1.4% - how did you calculate this?*

We derived these three numbers from the entire 13 day dataset underlying Figure 2. In that dataset, when ejections occur in a 30 minute interval, they average 3.8 % of the total CO<sub>2</sub> flux. Contributions up to 20% are observed also, but that is the high end of the distribution. When considering all 30 min intervals, including those without ejections, ejections contribute 1.4% of the NEE flux.

Change:

- We restructured the paragraph to more clearly indicate the difference between the 3 numbers.
- We clarify that these statistics are taken from the full dataset of 13 days, and not from Fig 2.



183: Fig A3 does not show either Keeling or Miller-Tans plots - why even mention Keeling plots if you didn't use them?

We intended to reference Fig A4 and not A3. This has now been solved. In Fig A4, both Keeling and Miller-Tans plots are shown. We believe it is good to show Keeling plots as they are still much more commonly used, and more intuitive to understand.

Changed:

- Fig. A3 → Fig. A4

197: "shaded understory leaves and soil evaporation are isotopically depleted compared to bulk sunlit leaves" I see 2 problems here. Most serious is that you have not measured the isotopic composition of soil \*evaporation\*, but bulk soil water. Second, ANOVA is needed to make the claim that understory leaves are more depleted than bulk sunlit leaves. Using the Craig-Gordon model would strengthen these claims

As presented in the rebutte of the main comment of reviewer 2, we have now in more detail addressed the water isotopic cycle. Here, we used the Craig - Gordon model, and clarify that while we have not measured the isotopic signature of soil evaporation, we can approximate it from the top soil water, assuming equilibrium fractionation.

The results of an ANOVA between the leaf bulk leaf samples and those taken from the understory results in a P-value of 0.34 (and an F-value of 0.92). We can thus not say that the understory leaves are significantly more depleted than bulk leaves are.

Change:

- (L. 197) Changed "soil evaporation", to "top soil water from which evaporation takes place".
- (L. 198) Added "An ANOVA test indicates that the depletion of understory leaves compared to bulk leaves is not significant for our sample (p=0.34)"

204: "wind ejections" is used here to refer to understory ejections, but earlier when discussing Shaw's paper you make a distinction between these - better to leave out "wind" here

The "wind ejections" mentioned in line 204 are intended to refer to the u'w' ejections from Shaw et al. (1983). So, while reviewer 2 thought we meant to refer to understory ejections, we specifically wanted to indicate u'w' based ejections with the word 'wind' ejections. No changes were made based on this comment.

210-213: this is too vague to understand

In the discussion (247-251), we explain our investigation into wind – ejections relationships more clearly. There, we focussed on the high frequency wind – ejection link. Now we also mention the results of Fig. A6, where we test if periods with ejections are statistically more gusty.

Changes:

- We remove the unclear section wind – ejection relationships from the results (L.210)
- (L.251) We expand on our understanding of the wind – ejection relationship in the discussion, including the lower frequency wind gust analysis.

214: *I would refer to this as time-lagged cross correlation*  
(<https://en.wikipedia.org/wiki/Cross-correlation>)

Adjusted accordingly: Terms changed in both the methods and results

215: *I am confused about the distinction between cloud onset (start of shading) and your use of "center of clouds" here. Fig 4C makes me think that ejections happen before the cloud arrives, but you are making the opposite point I think (clouds lead to ejections). More clarity needed here*

We mention both ‘cloud onsets’ and ‘cloud centers’ explicitly, as we perform an analysis with both of these variables. The time-lagged cross correlation (Fig. 4B) naturally indicates the averaged distance of ejections to the the center of clouds, while the ejection distribution (Fig. 4C) was plotted around the cloud onset. In L. 216 we mention that the cloud center was ‘selected’ when discussing the time-lagged cross correlation, while it is rather a consequence of the method. We suspect that caused some unclarity for reviewer 2. Moreover, we find that in line 231, we accidentally refer to the cloud center, while we intended to say cloud onset.

Indeed we suggest that clouds might be both a trigger for ejections (although the correlation is low), and that ejections preceed the arrival of the cloud center. We speculate that either the initial shading of cloud onsets, or the wind dynamics around (and ‘ahead of’) the cloud are ejection triggers. We more clearly indicate this by adding a sentence to the description of Fig. 4C, which shows the preferential presence of ejections around cloud onsets.

Changes:

- (L.216) We clarify that time-lagged cross correlation naturally takes the cloud center as the anchor point.
- (L.231) We correct a mistake in using ‘cloud center’ instead of ‘cloud onset’
- (L.235) We indicate that Fig. 4C supports the idea that ejections are related to cloud onsets, rather than cloud centers.

216: radiation (not radiate)

Adjusted accordingly

Fig 4C ejection is spelled wrong in the legend

Adjusted accordingly

221: the very low correlation coefficients worry me, and really weaken your argument that these are correlated - can you do more simulations to see if these values of  $r$  can be achieved randomly? maybe randomize both time series independently many times then repeat the test and compare the results

We agree that the correlation coefficients are low, and lower than what we expected based on our hypothesis, as indicated in the discussion and conclusion. As we do not state that clouds and ejections are clearly correlated, we are comfortable in sharing this weak correlation. We would be more hesitant if the pattern in the time-lagged cross correlation was erratic.

We found it more natural to apply simulations as suggested by reviewer 2 in analysis 2 (Fig. 4C). There we randomly vary the cloud fields to prove the statistical robustness of our findings. The result indicates that the likelihood of ejections occurring near a cloud onsets exceeds what would randomly be expected. That confirms that there is likely some link between clouds and ejections.

232: the synthetic simulations need more detail, I don't understand

To find out how our result compares to cases where clouds and ejections certainly are not linked, we created 379 'synthetic' cumulative histograms. We did this by applying a time shift to the cloud field of at least 1 hour compared to the real measurement, and differing by 15 minutes between synthetic samples. Ultimately, each ejection gets colocated with 379 unrelated cloud fields. The advantage over designing cloud or ejection fields manually or randomly is that here, the temporal distribution between clouds remains realistic. Only data from the 09:00 – 16:30 period, during which ejections are present, were used. The synthetic data in the figure is the average histograms over these 379 runs.

Changes:

- (L.232) we add details on how the synthetic distribution was made.
- (L.233) we better describe how the observations deviate from the synthetic case.

241: moist air yes, but you do not show evidence for saturation of water vapor in air

Adjusted accordingly: saturated replaced by moist

242: *"depleted" is a relative term. Understory ejections seem to have  $\delta D$  values of -30 to -40 ‰, which is \*enriched\* relative to the atmospheric background (Fig 3A). The understory transpiration flux is likely close to deep soil water (-20 ‰) which is also very enriched relative to background. The Craig-Gordon model would help here.*

We have now described the isotopic story in more detail, and included the Craig-Gordon model. We have specified in L.242 that the depletion is with respect to the vapor from the bulk canopy transpiration.

Changes:

- Specify depletion with respect to bulk canopy transpiration.

252-261: *this is a wandering paragraph and rather speculative*

We decided to keep the paragraph in as we believe the considerations we share put our analysis in context, and can help future experimental design. For clarity sake, we leave out the suggested translation from 1D temporal space to 1D physical space. In addition, we more clearly separate the effect of wind speed (which does not matter for our analysis) and wind shear (which does introduce a bias).

Changes:

- Remove L. 260
- (L. 258) clarify that strong wind shear might cause uncertainties, not high wind speeds.

## References

- Barbour, M. M., Farquhar, G. D., & Buckley, T. N. (2017). Leaf water stable isotopes and water transport outside the xylem. In *Plant Cell and Environment* (Vol. 40, Issue 6, pp. 914–920). Blackwell Publishing Ltd. <https://doi.org/10.1111/pce.12845>
- Canet-Martí, A., Morales-Santos, A., Nolz, R., Langergraber, G., & Stumpp, C. (2023). Quantification of water fluxes and soil water balance in agricultural fields under different tillage and irrigation systems using water stable isotopes. *Soil and Tillage Research*, 231. <https://doi.org/10.1016/j.still.2023.105732>
- Cernusak, L. A., Barbour, M. M., Arndt, S. K., Cheesman, A. W., English, N. B., Feild, T. S., Helliker, B. R., Holloway-Phillips, M. M., Holtum, J. A. M., Kahmen, A., Mcinerney, F. A., Munksgaard, N. C., Simonin, K. A., Song, X., Stuart-Williams, H., West, J. B., & Farquhar, G. D. (2016). Stable isotopes in leaf water of terrestrial plants. *Plant Cell and Environment*, 39(5), 1087–1102. <https://doi.org/10.1111/pce.12703>
- Craig, H., & Gordon, L. I. (1965). *Stable Isotopes in Oceanographic Studies*.
- de Deurwaerder, H. P. T., Visser, M. D., Detto, M., Boeckx, P., Meunier, F., Kuehnhammer, K., Magh, R. K., Marshall, J. D., Wang, L., Zhao, L., & Verbeeck, H. (2020). Causes and consequences of pronounced variation in the isotope composition of plant xylem water. *Biogeosciences*, 17(19), 4853–4870. <https://doi.org/10.5194/bg-17-4853-2020>
- Farquhar, G. D., Cernusak, L. A., & Barnes, B. (2007). Heavy water fractionation during transpiration. In *Plant Physiology* (Vol. 143, Issue 1, pp. 11–18). American Society of Plant Biologists. <https://doi.org/10.1104/pp.106.093278>
- Farquhar, G. D., & Lloyd, J. (1993). Carbon and Oxygen Isotope Effects in the Exchange of Carbon Dioxide between Terrestrial Plants and the Atmosphere. In *Stable Isotopes and Plant Carbon-water Relations* (pp. 47–70). Academic Press. <https://doi.org/10.1016/b978-0-08-091801-3.50011-8>
- González-Armas, R., Rikkers, D., Hartogensis, O., Quaresma Dias-Júnior, C., Komiya, S., Pugliese, G., Williams, J., van Asperen, H., a-Guerau de Arellano, J., & de Boer, H. J. (2025). Daytime water and CO<sub>2</sub> exchange within and above the Amazon rainforest. *Agricultural and Forest Meteorology*, Preprint.
- Rothfuss, Y., & Javaux, M. (2017). Reviews and syntheses: Isotopic approaches to quantify root water uptake: A review and comparison of methods. *Biogeosciences*, 14(8), 2199–2224. <https://doi.org/10.5194/bg-14-2199-2017>
- Shaw, R. H., Tavangar, J., & Ward, D. P. (1983). Structure of the Renolds Stress in a Canopy Layer. *Journal of Climate and Applied Meteorology*, 22, 1922–1931.
- Spiridonov, V., & Ćurić, M. (2021). Atmospheric Boundary Layer (ABL). In *Fundamentals of Meteorology* (pp. 219–228). Springer International Publishing. [https://doi.org/10.1007/978-3-030-52655-9\\_14](https://doi.org/10.1007/978-3-030-52655-9_14)
- Vega-Grau, A. M., McDonnell, J., Schmidt, S., Annandale, M., & Herbohn, J. (2021). Isotopic fractionation from deep roots to tall shoots: A forensic analysis of xylem water isotope composition in mature tropical savanna trees. *Science of the Total Environment*, 795. <https://doi.org/10.1016/j.scitotenv.2021.148675>
- York, D. (1968). Least squares fitting of a straight line with correlated errors. *Earth and Planetary Science Letters*, 5(C), 320–324. [https://doi.org/10.1016/S0012-821X\(68\)80059-7](https://doi.org/10.1016/S0012-821X(68)80059-7)
